# Supplementary material for: Identification and Characterization of Non-Saccharomyces Species Isolated from Port Wine Spontaneous Fermentations
Source: PubMed Central journal article supplement (PMC7074312; doi:10.3390/foods9020120), 2020-01-23
Supplement: foods-09-00120-s001.pdf [file foods-09-00120-s001.pdf]

## Supplementary Material

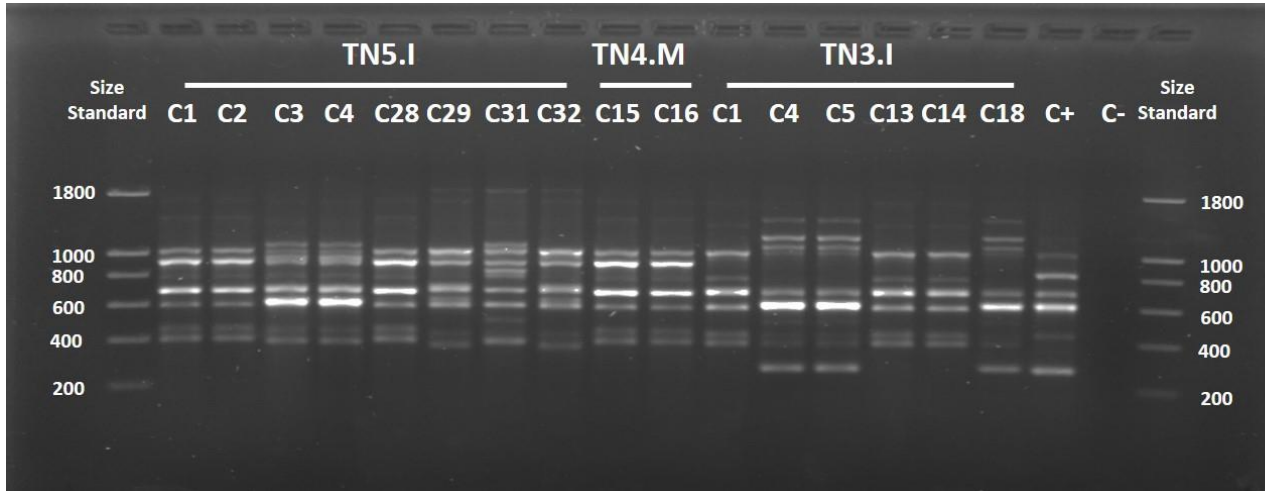

**Figure S1: Representative image of DNA patterns of selected *M. pulcherrima* strains isolated from Port wine must samples, generated by RAPD-PCR analysis with the oligonucleotide M14.** PCR products were analyzed on 1.5% agarose gel, in 1X Tris–borate EDTA, at 100 V for 2 h, and the size of DNA fragments was estimated by comparison with a DNA molecular weight marker (Size standard ranging from 200 to 1800 bp).

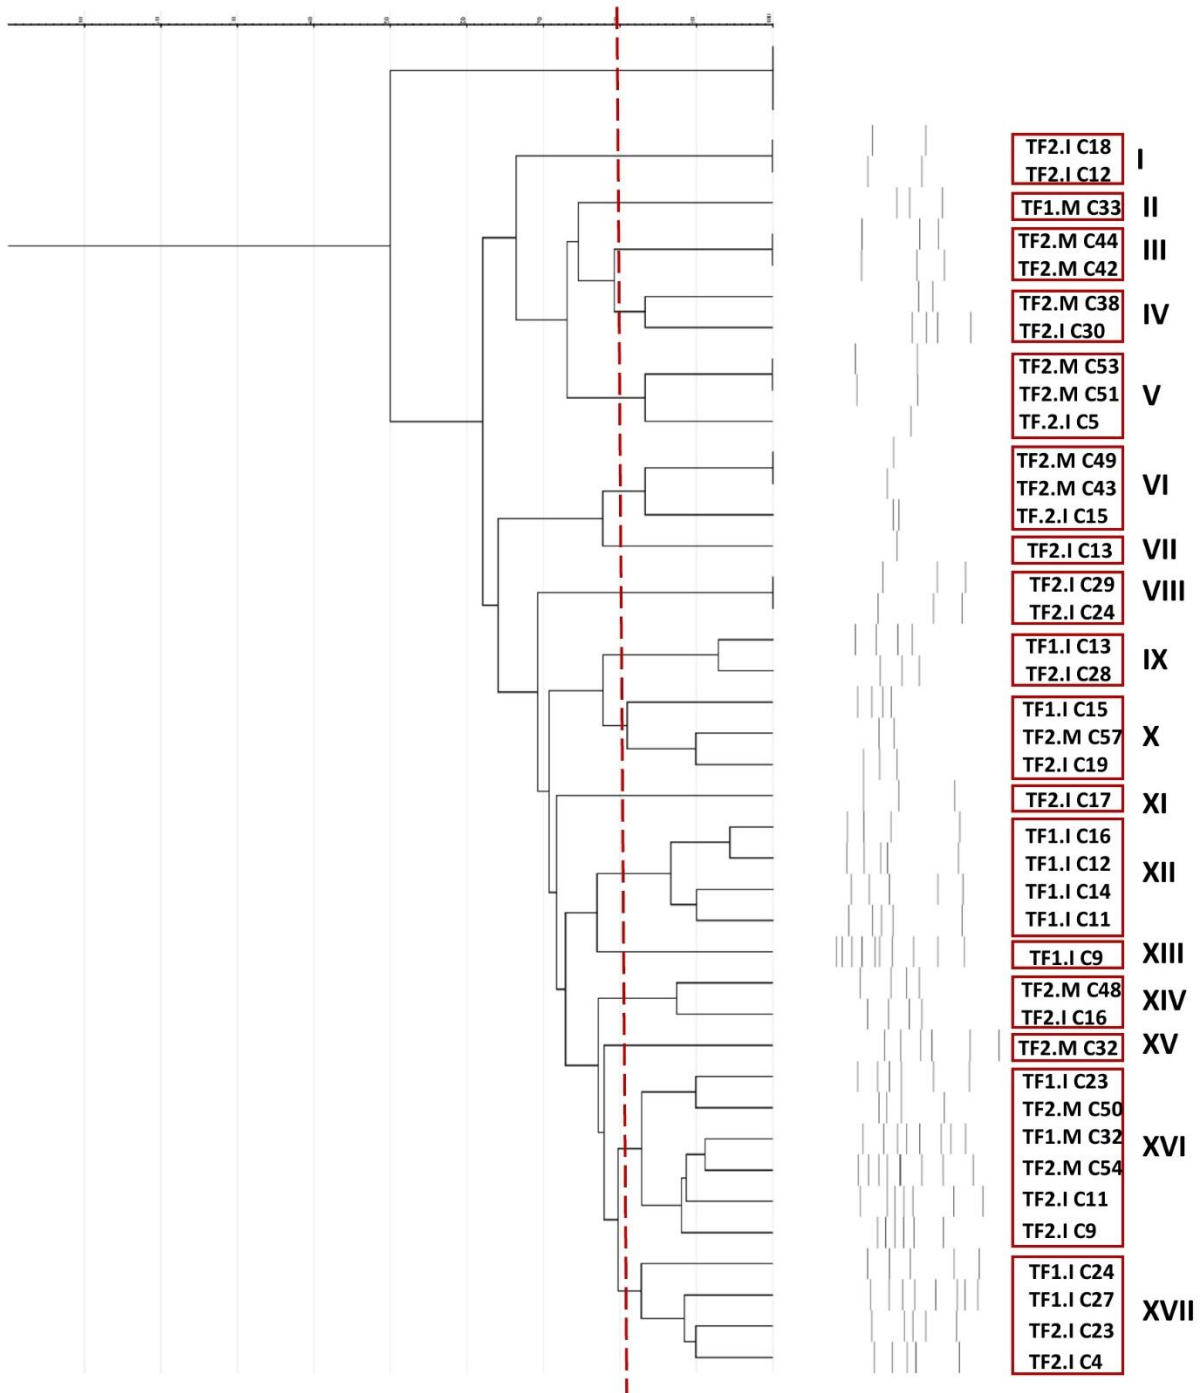

**Figure S2: Cluster analysis of *H. uvarum* strains isolated from Port wine must samples fermented with Touriga Franca grape variety.** Dendrograms were produced by hierarchical clustering of the electrophoretic patterns obtained by RAPD-PCR with the oligonucleotide P80. Dendrograms were generated using the Dice similarity coefficient with a tolerance of 10 and the UPGMA algorithm. Samples were considered of the same strain for similarity values  $\geq 80\%$  (red line). Groups of strains identified in roman numerals. Phylogenetic trees were constructed with GelJ v 2.0 software.

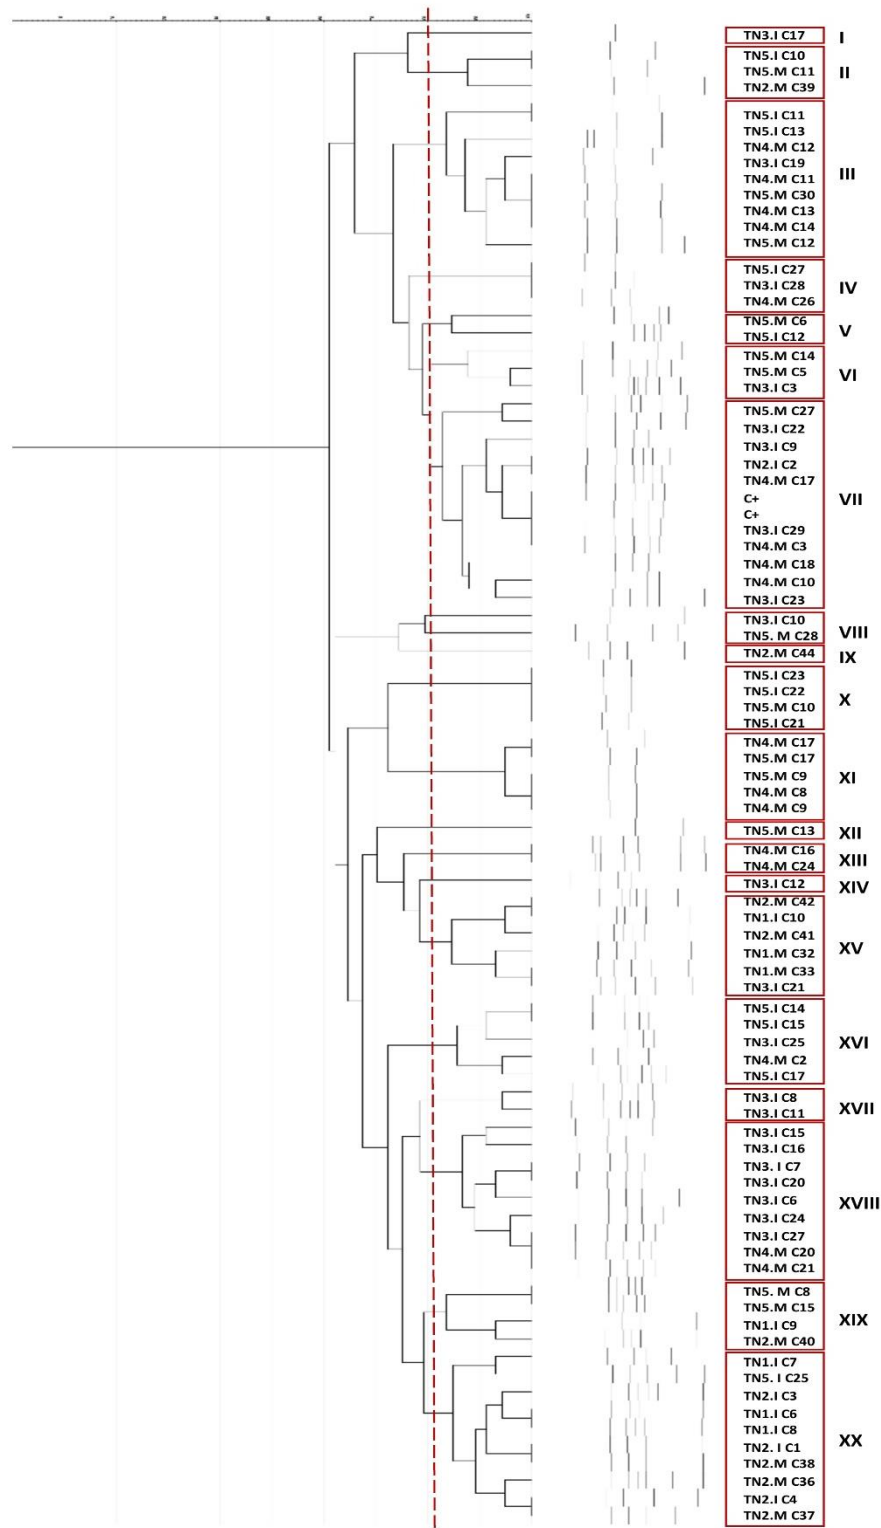

**Figure S3: Cluster analysis of *H. uvarum* strains isolated from Port wine must samples fermented with Touriga Nacional grape variety.** Dendrograms were produced by hierarchical clustering of the electrophoretic patterns obtained by RAPD-PCR with the oligonucleotide P80. Dendrograms were generated using the Dice similarity coefficient with a tolerance of 10 and the UPGMA algorithm. Samples were considered of the same strain for similarity values  $\geq 80\%$  (red line). Groups of strains identified in roman numbers. Phylogenetic trees were constructed with GelJ v 2.0 software.

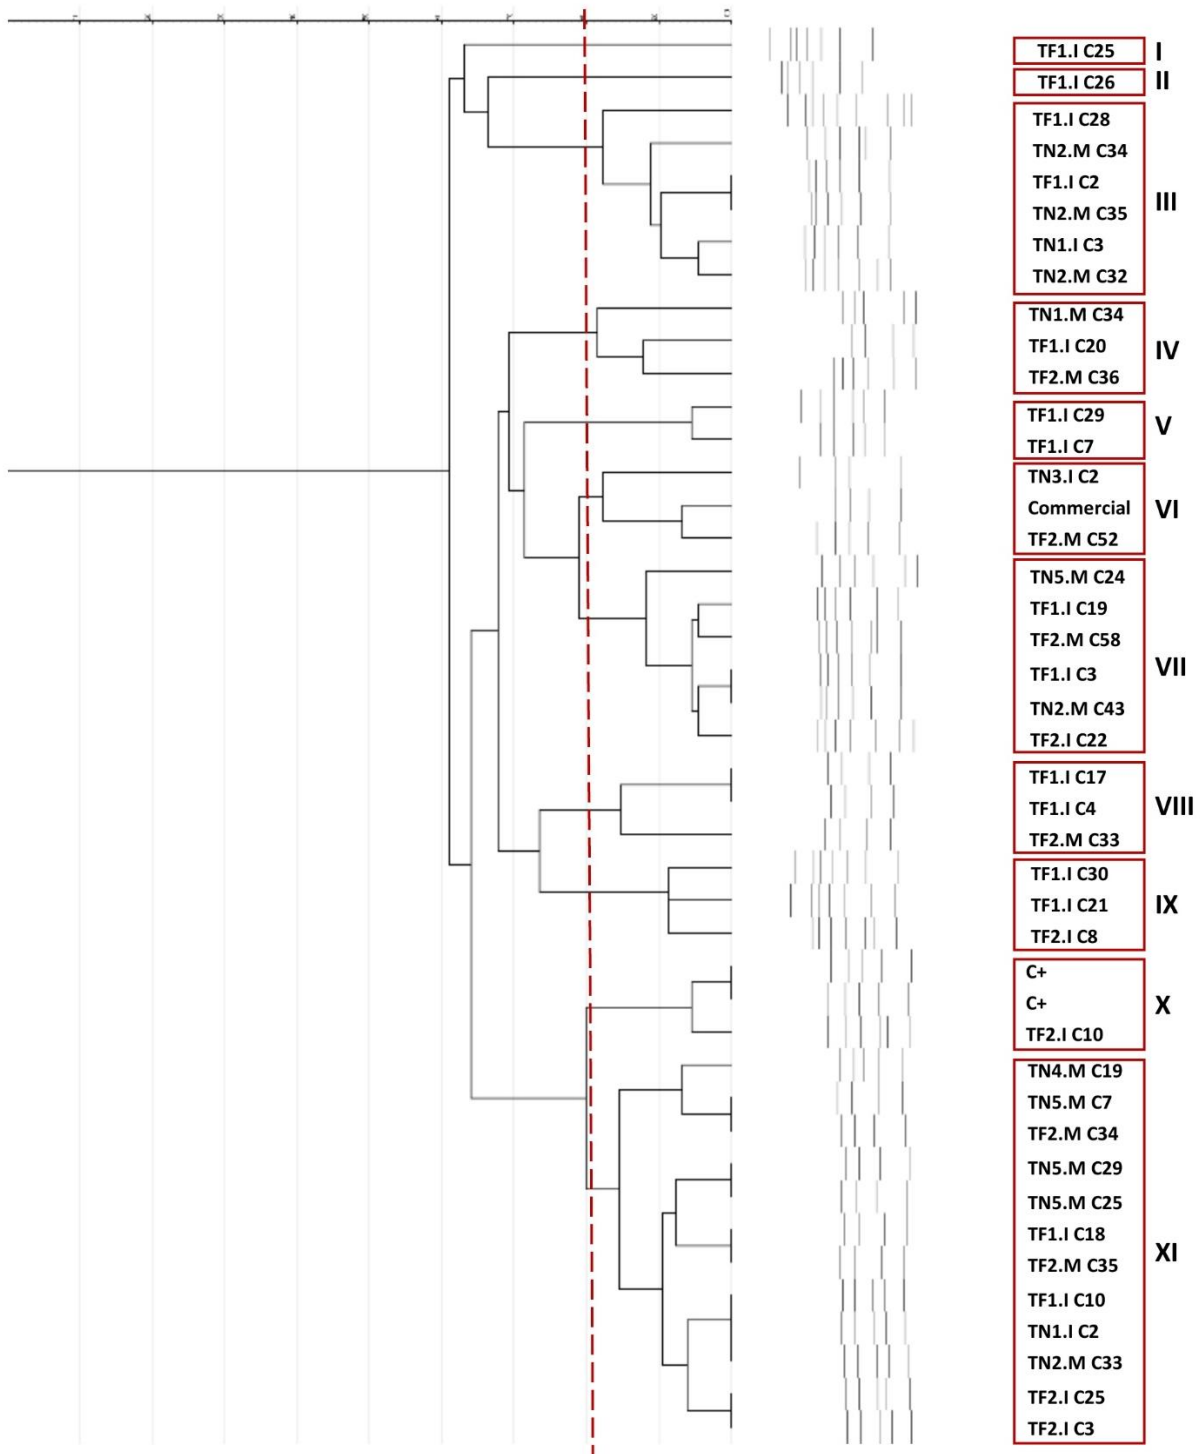

**Figure S4: Cluster analysis of *L. thermotolerans* strains isolated from Port wine must samples.** Dendrograms were produced by hierarchical clustering of the electrophoretic patterns obtained by RAPD-PCR with the oligonucleotide M14. Dendrograms were generated using the Dice similarity coefficient with a tolerance of 10 and the UPGMA algorithm. Samples were considered of the same strain for similarity values  $\geq 80\%$  (red line). Groups of strains identified in roman numerals. Phylogenetic trees were constructed with GelJ v 2.0 software.

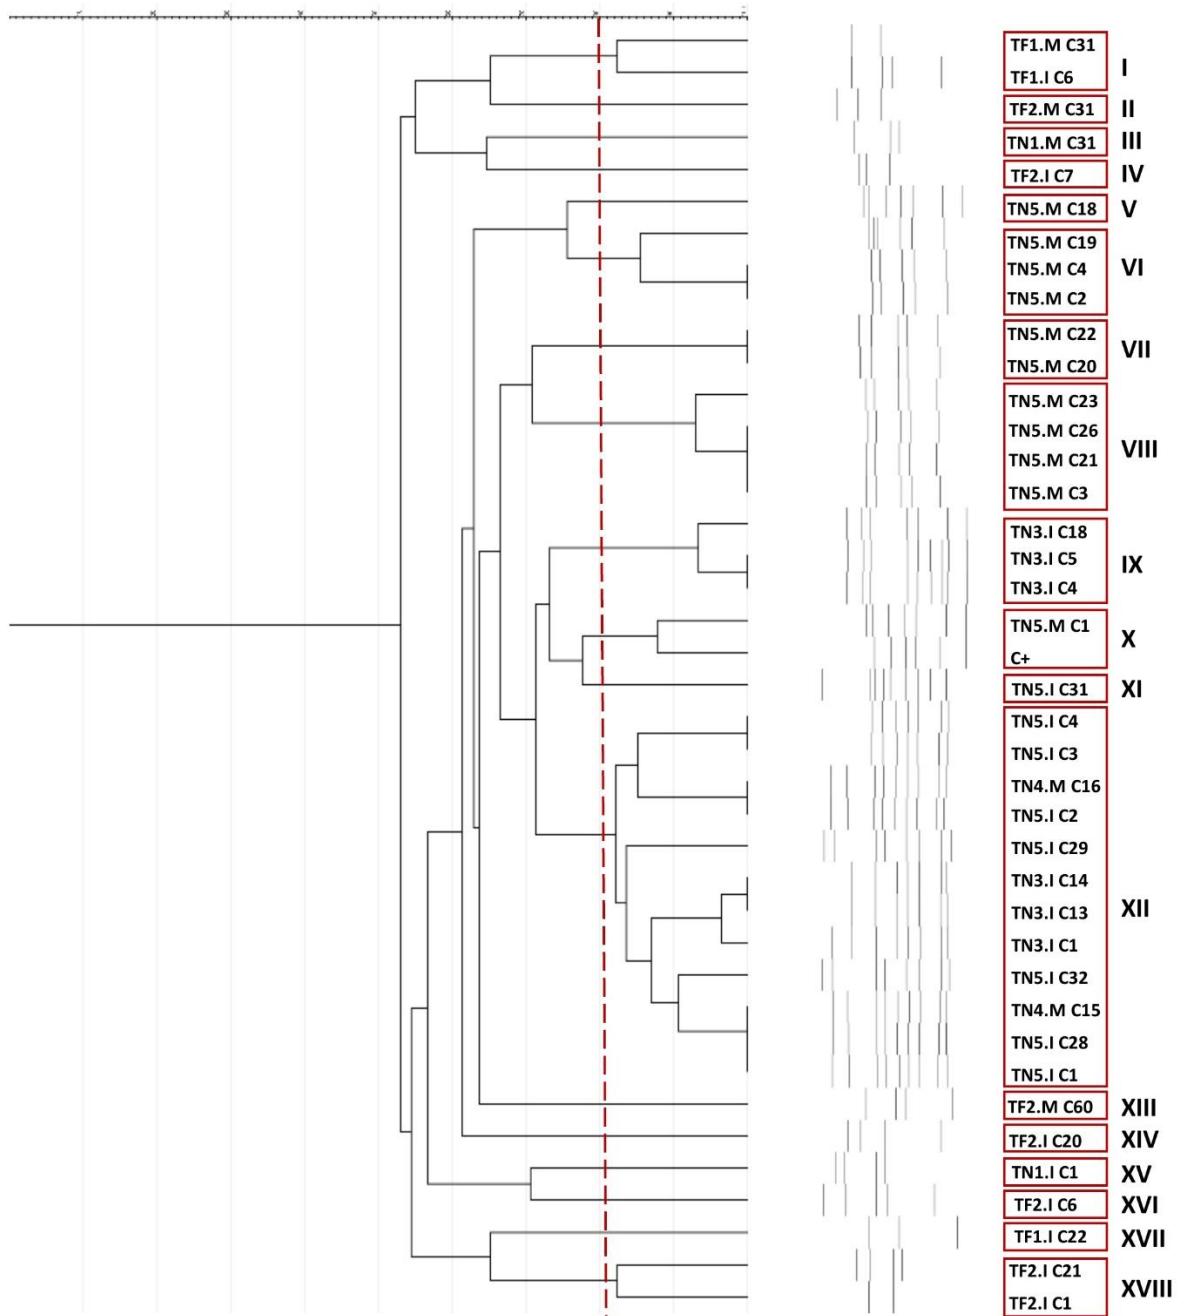

**Figure S5: Cluster analysis of *M. pulcherrima* strains isolated from Port wine must samples.** Dendrograms were produced by hierarchical clustering of the electrophoretic patterns obtained by RAPD-PCR with the oligonucleotide M14. Dendrograms were generated using the Dice similarity coefficient with a tolerance of 10 and the UPGMA algorithm. Samples were considered of the same strain for similarity values  $\geq 80\%$  (red line). Groups of strains identified in roman numerals. Phylogenetic trees were constructed with GelJ v 2.0 software.

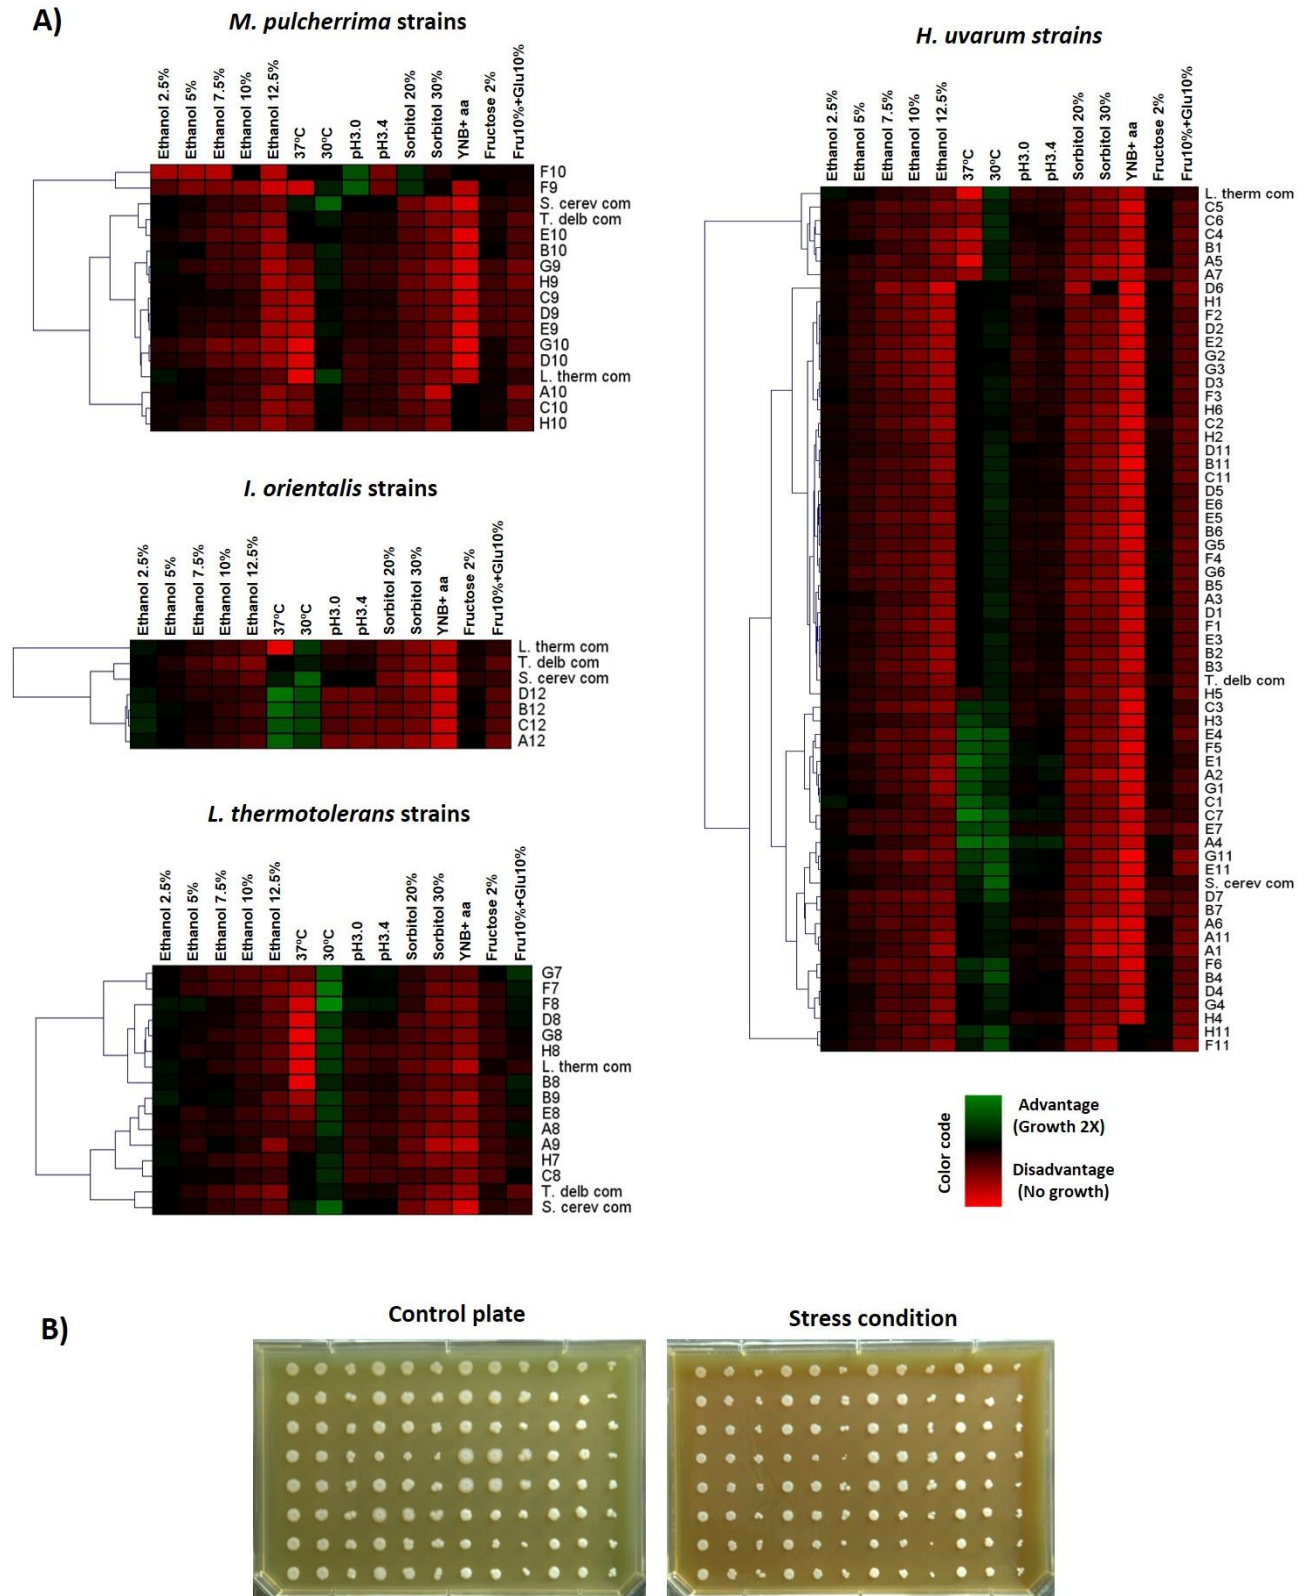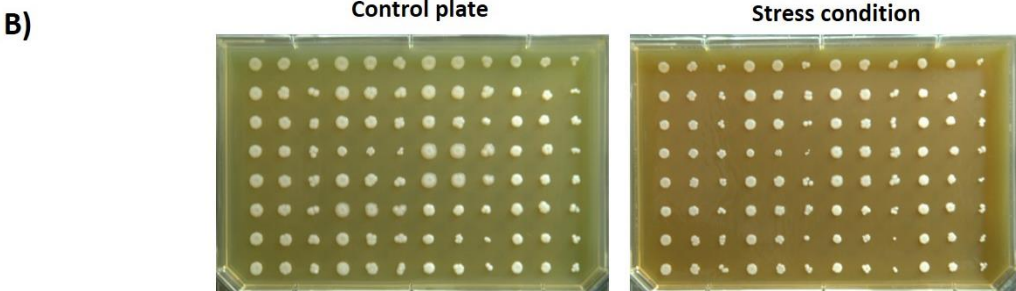

**Figure S6: Heatmaps representing the growth performance of non-Saccharomyces strains isolated from Port wine must samples on stress conditions associated with alcoholic fermentation. A) Results represent the growth advantage (green) and disadvantage (red) of selected strains on YEPD culture plates**

supplemented with stress conditions associated with alcoholic fermentation. Stress conditions include different concentrations of ethanol (EtOH), temperatures (37°C and 30°C), acidic pH (3.0 and 3.4), osmotic stress (Sorbitol 20%, and 30%), different nitrogen source (YNB + essential amino acids), and different carbon sources (Fructose 2% and Fructose 10% + Glucose 10%). For the assay were selected 92 non-*Saccharomyces* strains previously isolated, and as experimental controls two commercial non-*Saccharomyces*, respectively *L. thermotolerans*, and *T. delbrueckii*, and the commercial *S. cerevisiae*. Results represent the variation of the colony size area quantified in the plates supplemented with stress conditions, relatively to the quantified in the control plates (no stress). Results represent mean values of biological triplicates from three independent growth experiments. The hierarchical clustering of the strains was performed with Pearson correlation distance. B) Representative images of phenotypic screening growth plates of selected isolates. Isolates were grown in the absence (control plate) and in the presence of a selected stress condition (Ethanol 10%), during 48h.

**Table S1: Details of must samples used in the study.**

| Must samples (N=22) | Wines selected for study (N=13) | Grape variety    | Harvest year                         |      |
|---------------------|---------------------------------|------------------|--------------------------------------|------|
| TN1.I               | TN1                             | Touriga Nacional | 2016                                 |      |
| TN1.M               |                                 |                  |                                      |      |
| TN2.I               | TN2                             |                  | 2016                                 |      |
| TN2.M               |                                 |                  |                                      |      |
| TN3.I               | TN3                             |                  | 2013                                 |      |
| TN4.I               | TN4                             |                  | 2015                                 |      |
| TN4.M               |                                 |                  |                                      |      |
| TN5.I               | TN5                             |                  | 2015                                 |      |
| TN5.M               |                                 |                  |                                      |      |
| TN6.M               | TN6                             |                  | 2013                                 |      |
| TN7.I               | TN7                             |                  | 2015                                 |      |
| TN7.M               |                                 |                  |                                      |      |
| TN8.I               | TN8                             |                  | 2016                                 |      |
| TN8.M               |                                 |                  |                                      |      |
| MIX.I               | MIX                             |                  | Touriga Nacional +<br>Touriga Franca | 2012 |
| TF1.I               | TF1                             |                  | Touriga Franca                       | 2016 |
| TF1.M               |                                 |                  |                                      |      |
| TF2.I               | TF2                             | 2015             |                                      |      |
| TF2.M               |                                 |                  |                                      |      |
| TF3.I               | TF3                             | 2015             |                                      |      |
| TF3.M               |                                 |                  |                                      |      |
| TF4.M               | TF4                             | 2016             |                                      |      |

**Table S2: Growth of selected non-*Saccharomyces* species isolated from Port wine must samples on stress conditions associated with alcoholic fermentation.**

| sample | source   | Strain      | Ethanol 2.5% | Ethanol 5% | Ethanol 7.5% | Ethanol 10% | Ethanol 12.5% | 37°C     | 30°C     | pH 3.0   | pH 3.4   | Sorbitol 20% | Sorbitol 30% | YNB+aa   | Fructose 2% | Fru10% + Glu10% |
|--------|----------|-------------|--------------|------------|--------------|-------------|---------------|----------|----------|----------|----------|--------------|--------------|----------|-------------|-----------------|
| A1     | isolated | 2 H. uvarum | 0,92948      | 0,891763   | 0,746751     | 0,655139    | 0,394511      | 0        | 1,136749 | 0,870275 | 0,922489 | 0,431123     | 0,179097     | 0,170929 | 0,856209    | 0,519523        |
| B1     | isolated | 2 H. uvarum | 1,007608     | 0,965205   | 0,779488     | 0,681629    | 0,429896      | 0,273553 | 1,165831 | 0,841661 | 0,904179 | 0,549555     | 0,485474     | 0,192849 | 0,948292    | 0,639785        |
| C1     | isolated | 2 H. uvarum | 1,135419     | 1,008323   | 0,870362     | 0,713341    | 0,506024      | 1,631694 | 1,360606 | 1,005285 | 1,10845  | 0,609054     | 0,515189     | 0,152436 | 0,941758    | 0,789435        |
| D1     | isolated | 2 H. uvarum | 0,943296     | 0,860659   | 0,681234     | 0,606867    | 0,430828      | 0        | 1,231137 | 0,858558 | 0,924405 | 0,574804     | 0,526624     | 0,189465 | 0,911789    | 0,648689        |
| E1     | isolated | 2 H. uvarum | 1,005562     | 0,884665   | 0,702598     | 0,627813    | 0,413701      | 1,694726 | 1,382061 | 1,075677 | 1,171153 | 0,5992       | 0,529961     | 0,172234 | 0,965148    | 0,837404        |
| F1     | isolated | 2 H. uvarum | 0,94772      | 0,840061   | 0,673186     | 0,557831    | 0,402743      | 0        | 1,099406 | 0,846696 | 0,911135 | 0,580484     | 0,550155     | 0,18744  | 0,970559    | 0,645555        |
| G1     | isolated | 2 H. uvarum | 1,005892     | 0,901772   | 0,730237     | 0,657085    | 0,417762      | 1,501868 | 1,201257 | 0,937345 | 1,01172  | 0,54961      | 0,494335     | 0,150564 | 0,913157    | 0,699715        |
| H1     | isolated | 2 H. uvarum | 0,941195     | 0,798042   | 0,620544     | 0,491784    | 0,341995      | 0        | 1,021701 | 0,797644 | 0,866328 | 0,564715     | 0,677607     | 0,083748 | 0,96921     | 0,578242        |
| A2     | isolated | 2 H. uvarum | 0,958259     | 0,841809   | 0,733226     | 0,608279    | 0,388265      | 1,544707 | 1,317452 | 0,96334  | 1,118539 | 0,489015     | 0,30996      | 0,124181 | 0,956937    | 0,729204        |
| B2     | isolated | 2 H. uvarum | 0,930795     | 0,842769   | 0,692878     | 0,595613    | 0,39006       | 0        | 1,155708 | 0,869084 | 0,933093 | 0,565149     | 0,515323     | 0,191326 | 0,986811    | 0,644262        |
| C2     | isolated | 2 H. uvarum | 0,925318     | 0,816379   | 0,649516     | 0,565371    | 0,38521       | 0        | 1,039921 | 0,870097 | 0,946054 | 0,509818     | 0,476035     | 0,111865 | 0,832245    | 0,574258        |
| D2     | isolated | 2 H. uvarum | 0,988289     | 0,792913   | 0,649454     | 0,56423     | 0,355323      | 0        | 1,146982 | 0,840755 | 0,941334 | 0,563        | 0,524162     | 0,143759 | 0,981437    | 0,657981        |
| E2     | isolated | 2 H. uvarum | 0,912275     | 0,749526   | 0,603563     | 0,507881    | 0,3423        | 0        | 1,12384  | 0,758902 | 0,882703 | 0,59053      | 0,529783     | 0,140754 | 0,932567    | 0,641442        |
| F2     | isolated | 2 H. uvarum | 0,945931     | 0,788194   | 0,61263      | 0,512345    | 0,33293       | 0        | 1,077189 | 0,879517 | 0,9793   | 0,620471     | 0,5576       | 0,16116  | 0,959053    | 0,695041        |
| G2     | isolated | 2 H. uvarum | 0,913828     | 0,755538   | 0,576752     | 0,490966    | 0,337929      | 0        | 1,014997 | 0,746826 | 0,859361 | 0,542299     | 0,458435     | 0,138011 | 0,948752    | 0,641273        |



| sample | source   | Strain      | Ethanol 2.5% | Ethanol 5% | Ethanol 7.5% | Ethanol 10% | Ethanol 12.5% | 37°C     | 30°C     | pH 3.0   | pH 3.4   | Sorbitol 20% | Sorbitol 30% | YNB+aa   | Fructose 2% | Fru10% + Glu10% |
|--------|----------|-------------|--------------|------------|--------------|-------------|---------------|----------|----------|----------|----------|--------------|--------------|----------|-------------|-----------------|
| H2     | isolated | 2 H. uvarum | 0,926648     | 0,853093   | 0,741492     | 0,645408    | 0,445318      | 0        | 1,144447 | 0,842179 | 0,906932 | 0,561103     | 0,504881     | 0,180452 | 0,928496    | 0,605576        |
| A3     | isolated | 2 H. uvarum | 0,994182     | 0,93473    | 0,768393     | 0,714855    | 0,456748      | 0        | 1,20265  | 0,849799 | 0,882167 | 0,510017     | 0,493864     | 0,240909 | 0,992064    | 0,643664        |
| B3     | isolated | 2 H. uvarum | 0,915451     | 0,805456   | 0,627619     | 0,57399     | 0,386719      | 0        | 1,173813 | 0,80057  | 0,888078 | 0,550228     | 0,497566     | 0,208422 | 0,992402    | 0,66708         |
| C3     | isolated | 2 H. uvarum | 0,919836     | 0,80534    | 0,624052     | 0,523059    | 0,44666       | 1,323483 | 1,282147 | 0,835384 | 0,918195 | 0,634801     | 0,536428     | 0,104022 | 1,00434     | 0,799218        |
| D3     | isolated | 2 H. uvarum | 0,956009     | 0,80183    | 0,625661     | 0,535377    | 0,372174      | 0        | 1,145375 | 0,774619 | 0,863413 | 0,59323      | 0,531773     | 0,178332 | 1,001153    | 0,618203        |
| E3     | isolated | 2 H. uvarum | 0,958846     | 0,869167   | 0,737485     | 0,657097    | 0,443695      | 0        | 1,201392 | 0,887657 | 0,937624 | 0,61661      | 0,575736     | 0,246872 | 1,004218    | 0,669959        |
| F3     | isolated | 2 H. uvarum | 1,013461     | 0,849131   | 0,708443     | 0,621237    | 0,420245      | 0        | 1,127588 | 0,810341 | 0,873855 | 0,619568     | 0,55659      | 0,212552 | 1,023842    | 0,669829        |
| G3     | isolated | 2 H. uvarum | 0,917651     | 0,782426   | 0,605412     | 0,542876    | 0,367908      | 0        | 1,062289 | 0,807071 | 0,882595 | 0,576264     | 0,512171     | 0,194516 | 1,028471    | 0,68376         |
| H3     | isolated | 2 H. uvarum | 0,957372     | 0,897626   | 0,818031     | 0,710559    | 0,61044       | 1,441972 | 1,21801  | 0,842011 | 0,958738 | 0,580364     | 0,523841     | 0,138995 | 1,024685    | 0,696566        |
| A4     | isolated | 2 H. uvarum | 1,039792     | 0,975464   | 0,813116     | 0,756651    | 0,546618      | 1,719673 | 1,652587 | 1,216383 | 1,254423 | 0,520951     | 0,455616     | 0,225585 | 1,045487    | 0,713337        |
| B4     | isolated | 2 H. uvarum | 0,945897     | 0,794234   | 0,643656     | 0,602588    | 0,459844      | 1,176955 | 1,515006 | 0,947583 | 0,991375 | 0,554202     | 0,491097     | 0,200041 | 0,989816    | 0,634247        |
| C4     | isolated | 2 H. uvarum | 0,930288     | 0,823654   | 0,640072     | 0,641231    | 0,436354      | 0,235747 | 1,288473 | 0,913455 | 0,938377 | 0,581222     | 0,582331     | 0,249281 | 0,982777    | 0,605117        |
| D4     | isolated | 2 H. uvarum | 0,995857     | 0,922541   | 0,717293     | 0,728522    | 0,531623      | 0        | 1,248497 | 0,995069 | 1,025923 | 0,587508     | 0,618777     | 0,252464 | 1,027066    | 0,638092        |
| E4     | isolated | 2 H. uvarum | 0,971903     | 0,838787   | 0,636874     | 0,651029    | 0,478096      | 1,591193 | 1,514371 | 0,943214 | 0,998756 | 0,548358     | 0,487532     | 0,199015 | 1,017026    | 0,592289        |
| F4     | isolated | 2 H. uvarum | 0,92083      | 0,782768   | 0,619086     | 0,614173    | 0,468176      | 0        | 1,172448 | 0,881007 | 0,89427  | 0,582042     | 0,514194     | 0,206389 | 1,052131    | 0,622508        |
| G4     | isolated | 2 H. uvarum | 0,999692     | 0,900209   | 0,685138     | 0,690886    | 0,486381      | 0        | 1,223026 | 0,982207 | 1,025593 | 0,589565     | 0,551857     | 0,231603 | 1,021036    | 0,599963        |

## Supplementary Material

| sample | source   | Strain      | Ethanol 2.5% | Ethanol 5% | Ethanol 7.5% | Ethanol 10% | Ethanol 12.5% | 37°C     | 30°C     | pH 3.0   | pH 3.4   | Sorbitol 20% | Sorbitol 30% | YNB+aa   | Fructose 2% | Fru10% + Glu10% |
|--------|----------|-------------|--------------|------------|--------------|-------------|---------------|----------|----------|----------|----------|--------------|--------------|----------|-------------|-----------------|
| H4     | isolated | 2 H. uvarum | 0,966163     | 0,853167   | 0,633839     | 0,653607    | 0,430563      | 0        | 1,094238 | 0,831285 | 0,856281 | 0,510667     | 0,490872     | 0,209403 | 1,04009     | 0,55278         |
| A5     | isolated | 2 H. uvarum | 0,95167      | 0,809216   | 0,640991     | 0,71804     | 0,505821      | 0,077099 | 1,170834 | 0,772525 | 0,835589 | 0,508067     | 0,332446     | 0,138997 | 0,964874    | 0,640373        |
| B5     | isolated | 2 H. uvarum | 0,9434       | 0,797875   | 0,671917     | 0,647786    | 0,462568      | 0        | 1,12673  | 0,851678 | 0,860636 | 0,487951     | 0,42978      | 0,121029 | 0,954431    | 0,60954         |
| C5     | isolated | 2 H. uvarum | 0,925728     | 0,811468   | 0,654763     | 0,661192    | 0,495818      | 0,427986 | 1,202371 | 0,849185 | 0,841877 | 0,538246     | 0,487263     | 0,130072 | 1,000201    | 0,640124        |
| D5     | isolated | 2 H. uvarum | 0,89692      | 0,774229   | 0,652449     | 0,655248    | 0,517617      | 0        | 1,189129 | 0,950256 | 0,950847 | 0,557145     | 0,475756     | 0,150486 | 0,959351    | 0,714709        |
| E5     | isolated | 2 H. uvarum | 0,904126     | 0,750257   | 0,608278     | 0,604475    | 0,463261      | 0        | 1,17997  | 0,860267 | 0,839135 | 0,540739     | 0,44054      | 0,136967 | 0,971946    | 0,639003        |
| F5     | isolated | 2 H. uvarum | 0,8973       | 0,747044   | 0,632605     | 0,64388     | 0,56617       | 1,574973 | 1,439146 | 1,065129 | 0,999451 | 0,564056     | 0,429572     | 0,101159 | 1,021721    | 0,75431         |
| G5     | isolated | 2 H. uvarum | 0,900217     | 0,779087   | 0,679018     | 0,655272    | 0,520914      | 0        | 1,15775  | 0,853147 | 0,835732 | 0,524821     | 0,439047     | 0,162615 | 0,945483    | 0,580036        |
| H5     | isolated | 2 H. uvarum | 0,973199     | 0,833684   | 0,758799     | 0,714248    | 0,575593      | 0,777068 | 1,176163 | 0,881175 | 0,850688 | 0,515932     | 0,526931     | 0,170062 | 1,010236    | 0,609995        |
| A6     | isolated | 2 H. uvarum | 0,933009     | 0,790146   | 0,637243     | 0,678396    | 0,544497      | 0        | 1,181174 | 0,811449 | 0,798505 | 0,44313      | 0,210455     | 0,118821 | 0,965848    | 0,591211        |
| B6     | isolated | 2 H. uvarum | 0,926591     | 0,8068     | 0,67249      | 0,667626    | 0,556563      | 0        | 1,170983 | 0,905267 | 0,903442 | 0,520618     | 0,418675     | 0,113521 | 1,002602    | 0,632366        |
| C6     | isolated | 2 H. uvarum | 0,951614     | 0,806719   | 0,711691     | 0,755695    | 0,606937      | 0,473575 | 1,285746 | 0,939962 | 0,891599 | 0,582837     | 0,51514      | 0,17594  | 0,99819     | 0,663791        |
| D6     | isolated | 2 H. uvarum | 0,923678     | 0,825008   | 0,449445     | 0,486209    | 0,156132      | 0        | 1,020282 | 0,928767 | 0,862902 | 0,323336     | 0            | 0,073996 | 1,000471    | 0,524694        |
| E6     | isolated | 2 H. uvarum | 0,952943     | 0,804694   | 0,673147     | 0,698742    | 0,55804       | 0        | 1,249215 | 0,909318 | 0,907394 | 0,604474     | 0,506517     | 0,222033 | 1,012272    | 0,671167        |
| F6     | isolated | 2 H. uvarum | 0,974742     | 0,757401   | 0,623553     | 0,637443    | 0,546684      | 1,307728 | 1,431398 | 0,945552 | 0,893323 | 0,546335     | 0,438672     | 0,115504 | 1,052228    | 0,653166        |
| G6     | isolated | 2 H. uvarum | 0,92239      | 0,707092   | 0,65113      | 0,63709     | 0,460263      | 0        | 1,183111 | 0,890071 | 0,857565 | 0,590747     | 0,498514     | 0,158666 | 1,02169     | 0,611082        |

## Supplementary Material

| sample | source   | Strain              | Ethanol 2.5% | Ethanol 5% | Ethanol 7.5% | Ethanol 10% | Ethanol 12.5% | 37°C     | 30°C     | pH 3.0   | pH 3.4   | Sorbitol 20% | Sorbitol 30% | YNB+aa   | Fructose 2% | Fru10% + Glu10% |
|--------|----------|---------------------|--------------|------------|--------------|-------------|---------------|----------|----------|----------|----------|--------------|--------------|----------|-------------|-----------------|
| H6     | isolated | 2 H. uvarum         | 0,906363     | 0,811476   | 0,695555     | 0,659014    | 0,432141      | 0,970833 | 1,106244 | 0,877186 | 0,850943 | 0,562849     | 0,444601     | 0,1551   | 1,000489    | 0,655523        |
| A7     | isolated | 2 H. uvarum         | 0,900608     | 0,758741   | 0,686366     | 0,653322    | 0,567336      | 0,369181 | 1,215049 | 0,82424  | 0,812819 | 0,492271     | 0,397323     | 0,223717 | 0,717582    | 0,623585        |
| B7     | isolated | 2 H. uvarum         | 0,9225       | 0,751534   | 0,681313     | 0,647008    | 0,571299      | 0        | 1,197767 | 0,926153 | 0,919428 | 0,531758     | 0,439193     | 0,224483 | 0,740726    | 0,63228         |
| C7     | isolated | 2 H. uvarum         | 0,932135     | 0,795807   | 0,733851     | 0,680644    | 0,650949      | 1,819964 | 1,54496  | 1,135958 | 1,120832 | 0,629349     | 0,535708     | 0,231332 | 0,764547    | 0,805756        |
| D7     | isolated | 2 H. uvarum         | 0,899826     | 0,704601   | 0,628949     | 0,560517    | 0,507598      | 1,121757 | 1,451887 | 0,907857 | 0,891465 | 0,527194     | 0,417486     | 0,153811 | 0,674889    | 0,682494        |
| E7     | isolated | 2 H. uvarum         | 0,95723      | 0,744635   | 0,71143      | 0,632771    | 0,588942      | 1,473533 | 1,476071 | 0,901305 | 0,88655  | 0,533929     | 0,442107     | 0,181573 | 0,700613    | 0,596209        |
| F7     | isolated | 3 L. thermotolerans | 1,001103     | 0,78301    | 0,705746     | 0,662937    | 0,527342      | 0,339499 | 1,785508 | 1,012482 | 1,030862 | 0,784193     | 0,557926     | 0,552902 | 0,834856    | 1,16574         |
| G7     | isolated | 3 L. thermotolerans | 0,978401     | 0,832212   | 0,683812     | 0,657434    | 0,587121      | 0,60634  | 1,607409 | 1,023995 | 1,079851 | 0,835875     | 0,672245     | 0,651575 | 1,014904    | 1,323612        |
| H7     | isolated | 3 L. thermotolerans | 1,084901     | 0,920763   | 0,808939     | 0,721014    | 0,663419      | 0        | 1,266846 | 0,708683 | 0,742685 | 0,582611     | 0,484047     | 0,489412 | 0,709395    | 0,856317        |
| A8     | isolated | 3 L. thermotolerans | 0,944161     | 0,882772   | 0,885607     | 0,814404    | 0,767942      | 0,714962 | 1,382989 | 0,749084 | 0,761799 | 0,635385     | 0,488899     | 0,419823 | 0,770223    | 1,103072        |
| B8     | isolated | 3 L. thermotolerans | 1,084696     | 0,95694    | 0,985761     | 0,840179    | 0,83269       | 0,067274 | 1,218516 | 0,871651 | 0,891077 | 0,736596     | 0,613901     | 0,603198 | 0,775472    | 1,181258        |
| C8     | isolated | 3 L. thermotolerans | 0,998893     | 0,974935   | 0,955307     | 0,856457    | 0,767865      | 0        | 1,287114 | 0,720173 | 0,739072 | 0,75341      | 0,673826     | 0,47076  | 0,706643    | 1,009138        |
| D8     | isolated | 3 L. thermotolerans | 1,074603     | 0,955339   | 0,925772     | 0,803019    | 0,62541       | 0,105892 | 1,372908 | 0,911185 | 0,959008 | 0,677223     | 0,562392     | 0,520431 | 0,832845    | 1,080519        |
| E8     | isolated | 3 L. thermotolerans | 1,009117     | 0,832837   | 0,916224     | 0,771778    | 0,663048      | 0,544004 | 1,375927 | 0,810438 | 0,839518 | 0,684137     | 0,591888     | 0,43825  | 0,768772    | 0,880207        |

| sample | source   | Strain              | Ethanol 2.5% | Ethanol 5% | Ethanol 7.5% | Ethanol 10% | Ethanol 12.5% | 37°C     | 30°C     | pH 3.0   | pH 3.4   | Sorbitol 20% | Sorbitol 30% | YNB+aa   | Fructose 2% | Fru10% + Glu10% |
|--------|----------|---------------------|--------------|------------|--------------|-------------|---------------|----------|----------|----------|----------|--------------|--------------|----------|-------------|-----------------|
| F8     | isolated | 3 L. thermotolerans | 1,123449     | 1,134638   | 0,944176     | 0,84197     | 0,602419      | 0,172411 | 1,899926 | 1,132679 | 1,119795 | 0,821908     | 0,506968     | 0,494339 | 0,803617    | 1,106452        |
| G8     | isolated | 3 L. thermotolerans | 0,99969      | 0,952771   | 0,825945     | 0,770734    | 0,675191      | 0,070518 | 1,446635 | 0,818346 | 0,844272 | 0,71368      | 0,62184      | 0,514812 | 0,782575    | 0,959312        |
| H8     | isolated | 3 L. thermotolerans | 0,996234     | 0,872217   | 0,894834     | 0,75831     | 0,637754      | 0,133645 | 1,403801 | 0,723133 | 0,740835 | 0,674479     | 0,626219     | 0,478569 | 0,784855    | 0,915907        |
| A9     | isolated | 3 L. thermotolerans | 1,062667     | 0,8269     | 1,030222     | 0,870216    | 0,458669      | 0,798838 | 1,13743  | 0,734328 | 0,865201 | 0,593574     | 0,283561     | 0,236492 | 0,754462    | 0,893141        |
| B9     | isolated | 3 L. thermotolerans | 1,157994     | 1,008033   | 1,06398      | 0,873546    | 0,641618      | 0,363051 | 1,397676 | 0,757262 | 0,840288 | 0,645761     | 0,516887     | 0,349672 | 0,780259    | 1,108129        |
| C9     | isolated | 4 M. pulcherrima    | 0,985927     | 0,95982    | 0,923376     | 0,829952    | 0,431812      | 0,319269 | 1,039433 | 0,892025 | 0,902883 | 0,633019     | 0,545487     | 0,182216 | 0,707701    | 0,688431        |
| D9     | isolated | 4 M. pulcherrima    | 0,977065     | 0,883781   | 0,839715     | 0,81479     | 0,385433      | 0,303719 | 1,06471  | 0,854157 | 0,864317 | 0,67626      | 0,571265     | 0,20713  | 0,712886    | 0,656142        |
| E9     | isolated | 4 M. pulcherrima    | 1,011384     | 0,863122   | 0,768392     | 0,767008    | 0,357229      | 0,265988 | 1,125379 | 0,867616 | 0,874292 | 0,702196     | 0,561998     | 0,122837 | 0,736251    | 0,647026        |
| F9     | isolated | 4 M. pulcherrima    | 0,670933     | 0,511192   | 0,520553     | 0,459899    | 0,181139      | 0,182769 | 1,209844 | 1,612486 | 0,590564 | 1,315334     | 0,956321     | 0,30046  | 0,986793    | 0,893442        |
| G9     | isolated | 4 M. pulcherrima    | 1,058535     | 0,82008    | 0,73729      | 0,715818    | 0,324687      | 0,540141 | 1,128166 | 0,78959  | 0,774349 | 0,614065     | 0,4255       | 0,14847  | 0,756566    | 0,532604        |
| H9     | isolated | 4 M. pulcherrima    | 0,969207     | 0,971274   | 0,781107     | 0,74186     | 0,330773      | 0,440774 | 1,17278  | 0,810387 | 0,804437 | 0,588975     | 0,461364     | 0,138681 | 0,746078    | 0,544422        |
| A10    | isolated | 4 M. pulcherrima    | 0,940892     | 0,984949   | 0,800803     | 0,767622    | 0,449446      | 0,588508 | 1,052767 | 0,837486 | 0,814497 | 0,584777     | 0,231255     | 0        | 0,951025    | 0,516684        |
| B10    | isolated | 4 M. pulcherrima    | 0,970067     | 0,999206   | 0,748978     | 0,695888    | 0,399749      | 0,69551  | 1,201819 | 0,822203 | 0,83175  | 0,698272     | 0,574678     | 0,199525 | 0,979644    | 0,714466        |

## Supplementary Material

| sample | source   | Strain           | Ethanol 2.5% | Ethanol 5% | Ethanol 7.5% | Ethanol 10% | Ethanol 12.5% | 37°C     | 30°C     | pH 3.0   | pH 3.4   | Sorbitol 20% | Sorbitol 30% | YNB+aa   | Fructose 2% | Fru10% + Glu10% |
|--------|----------|------------------|--------------|------------|--------------|-------------|---------------|----------|----------|----------|----------|--------------|--------------|----------|-------------|-----------------|
| C10    | isolated | 4 M. pulcherrima | 0,924889     | 0,90138    | 0,732318     | 0,70414     | 0,435587      | 0,493396 | 1,042911 | 0,844525 | 0,829314 | 0,65277      | 0,541589     | 0        | 0,916512    | 0,714041        |
| D10    | isolated | 4 M. pulcherrima | 0,886224     | 0,816279   | 0,643885     | 0,590772    | 0,380683      | 0,135457 | 0,979293 | 0,729439 | 0,815539 | 0,664401     | 0,571189     | 0,090789 | 0,924958    | 0,653473        |
| E10    | isolated | 4 M. pulcherrima | 0,921482     | 0,804957   | 0,661897     | 0,64047     | 0,40168       | 0        | 1,000307 | 0,88685  | 0,898619 | 0,669318     | 0,526127     | 0,101763 | 0,933497    | 0,691587        |
| F10    | isolated | 4 M. pulcherrima | 0,345291     | 0,328027   | 0,275785     | 0           | 0,283184      | 0        | 0        | 1,533133 | 0,536099 | 1,306276     | 0,84925      | 0        | 0,932464    | 0,942774        |
| G10    | isolated | 4 M. pulcherrima | 0,848297     | 0,735528   | 0,524095     | 0,533716    | 0,362686      | 0,083143 | 0,956908 | 0,796248 | 0,823875 | 0,675761     | 0,527613     | 0,08373  | 0,925363    | 0,702962        |
| H10    | isolated | 4 M. pulcherrima | 0,942199     | 0,824955   | 0,64141      | 0,610649    | 0,419101      | 0,585654 | 0,979451 | 0,698549 | 0,700904 | 0,698584     | 0,509262     | 0        | 0,95138     | 0,626434        |
| A11    | isolated | 2 H. uvarum      | 0,910392     | 0,856222   | 0,749803     | 0,653605    | 0,445528      | 0        | 1,124754 | 0,961046 | 0,901059 | 0,528198     | 0,25874      | 0,128731 | 0,955441    | 0,562842        |
| B11    | isolated | 2 H. uvarum      | 0,921998     | 0,794429   | 0,695078     | 0,659502    | 0,437769      | 0        | 1,201035 | 0,924909 | 0,888419 | 0,544622     | 0,392857     | 0,063777 | 0,950799    | 0,621957        |
| C11    | isolated | 2 H. uvarum      | 0,893157     | 0,801646   | 0,728488     | 0,679613    | 0,458584      | 0        | 1,243962 | 0,947964 | 0,915731 | 0,600743     | 0,468813     | 0,132179 | 0,967815    | 0,592849        |
| D11    | isolated | 2 H. uvarum      | 0,94664      | 0,864146   | 0,767517     | 0,711832    | 0,503178      | 0        | 1,214481 | 0,98124  | 0,949506 | 0,585453     | 0,458975     | 0,103374 | 0,944196    | 0,605616        |
| E11    | isolated | 2 H. uvarum      | 0,980969     | 0,843779   | 0,781198     | 0,675215    | 0,58438       | 1,34059  | 1,633195 | 1,073576 | 1,033502 | 0,529795     | 0,395784     | 0,098047 | 0,947976    | 0,530012        |
| F11    | isolated | 2 H. uvarum      | 0,949076     | 0,832251   | 0,704516     | 0,636231    | 0,47144       | 1,121888 | 1,466344 | 0,991084 | 0,929787 | 0,547213     | 0,353087     | 0        | 0,93291     | 0,412333        |
| G11    | isolated | 2 H. uvarum      | 0,945664     | 0,77519    | 0,689394     | 0,512219    | 0,498211      | 1,389822 | 1,473048 | 1,055116 | 1,021738 | 0,597504     | 0,386064     | 0,041425 | 0,971555    | 0,473933        |
| H11    | isolated | 2 H. uvarum      | 1,013707     | 0,840944   | 0,757618     | 0,597418    | 0,587449      | 1,286289 | 1,491601 | 1,055889 | 0,997381 | 0,551908     | 0,377647     | 0        | 1,03648     | 0,514321        |

## Supplementary Material

| sample | source     | Strain                     | Ethanol 2.5% | Ethanol 5% | Ethanol 7.5% | Ethanol 10% | Ethanol 12.5% | 37°C     | 30°C     | pH 3.0   | pH 3.4   | Sorbitol 20% | Sorbitol 30% | YNB+aa   | Fructose 2% | Fru10% + Glu10% |
|--------|------------|----------------------------|--------------|------------|--------------|-------------|---------------|----------|----------|----------|----------|--------------|--------------|----------|-------------|-----------------|
| A12    | isolated   | 1 <i>I. orientalis</i>     | 1,120514     | 1,003743   | 0,88132      | 0,780771    | 0,686274      | 1,650321 | 1,389837 | 0,567591 | 0,529979 | 0,527748     | 0,426584     | 0,214241 | 0,994014    | 0,59514         |
| B12    | isolated   | 1 <i>I. orientalis</i>     | 1,208486     | 1,0592     | 0,939768     | 0,810642    | 0,713343      | 1,697947 | 1,448439 | 0,643966 | 0,577649 | 0,630709     | 0,542986     | 0,238663 | 1,013653    | 0,677369        |
| C12    | isolated   | 1 <i>I. orientalis</i>     | 1,240114     | 1,015359   | 0,914142     | 0,836415    | 0,785504      | 1,556391 | 1,451616 | 0,686337 | 0,618104 | 0,604849     | 0,553225     | 0,207667 | 0,926573    | 0,674979        |
| D12    | isolated   | 1 <i>I. orientalis</i>     | 1,147419     | 0,931808   | 0,851809     | 0,840649    | 0,782079      | 1,796309 | 1,523484 | 0,591703 | 0,572814 | 0,64656      | 0,527947     | 0,233161 | 0,957014    | 0,658464        |
| SC com | commercial | 6 <i>S. cerevisiae</i>     | 0,996669     | 0,934387   | 0,803285     | 0,766646    | 0,617416      | 1,173761 | 1,651601 | 1,001287 | 1,001953 | 0,567897     | 0,378874     | 0,136371 | 0,843832    | 0,792806        |
| LT com | commercial | 3 <i>L. thermotolerans</i> | 1,104795     | 0,974523   | 0,841542     | 0,771818    | 0,629043      | 0,088773 | 1,388048 | 0,751676 | 0,816758 | 0,621837     | 0,503654     | 0,284514 | 0,932429    | 0,822507        |
| TD com | commercial | 5 <i>T. delbrueckii</i>    | 1,006617     | 0,862849   | 0,722482     | 0,600125    | 0,487608      | 0        | 1,153521 | 0,884628 | 0,897632 | 0,639346     | 0,496365     | 0,365552 | 0,893135    | 0,641966        |

Table S3: Quantification of metabolite for selected non-*Saccharomyces* species isolated from Port wine must samples.

| Sample | Specie                   | OD       | Glucose  | Fructose | Ethanol  | Glycerol | Mannitol | Citric acid | Tartaric acid | Malic acid | Acetic acid | Succinic acid | Lactic acid | Pyruvic acid |
|--------|--------------------------|----------|----------|----------|----------|----------|----------|-------------|---------------|------------|-------------|---------------|-------------|--------------|
| A2     | <i>H. uvarum</i>         | 4,196333 | 33,83667 | 25,74    | 27,02333 | 6,076667 | 0,773333 | 0,2939      | 0,011467      | -2,73757   | 0,456267    | 0,6753        | 0,1103      | 0,208333     |
| A9     | <i>L. thermotolerans</i> | 3,657667 | 47,38    | 28,10333 | 26,71    | 4,983333 | 0,993333 | 0,0748      | -0,2123       | -3,04067   | 0           | -0,61233      | 0,276467    | 0,0664       |
| A10    | <i>M. pulcherrima</i>    | 6,763333 | 34,90167 | 16,76333 | 20,72    | 4,745    | 10,15    | 1,274017    | -0,5725       | -3,71245   | 0           | -0,1636       | 0,24925     | 0,074933     |
| B8     | <i>L. thermotolerans</i> | 3,643    | 49,99333 | 35,35667 | 19,93333 | 5,163333 | 0,686667 | 0,3054      | 0,129867      | -2,1441    | 0           | -0,2872       | 3,459833    | 0,074        |
| B9     | <i>L. thermotolerans</i> | 4,721    | 42,53667 | 27,06    | 23,14667 | 6,146667 | 1,31     | 0,279167    | -0,1429       | -2,7223    | 0           | -0,12883      | 0,488467    | 0,0878       |
| B10    | <i>M. pulcherrima</i>    | 5,638667 | 75,39667 | 45,81833 | 31,11    | 6,585    | 15,675   | 2,425533    | 0,5015        | -1,85783   | 0           | 1,868083      | 0,703383    | 0,171467     |
| B12    | <i>I. orientalis</i>     | 8,416667 | 87,57333 | 33,48    | 43,15    | 6,32     | 0,2      | 0,917267    | -0,14223      | -3,25693   | 0,2285      | -0,1849       | 0,5677      | 0,082867     |
| C1     | <i>H. uvarum</i>         | 3,651333 | 35,57667 | 28,37333 | 19,48667 | 7,253333 | 1        | 0,325733    | -0,11283      | -2,95147   | 0,4959      | 2,6252        | -0,0028     | 0,347567     |
| C7     | <i>H. uvarum</i>         | 3,595    | 17,37667 | 17,79667 | 16,92333 | 6,053333 | 0,93     | 0,1853      | -0,14973      | -2,4243    | 0,174167    | 1,296767      | 0,063267    | 0,2564       |
| C8     | <i>L. thermotolerans</i> | 4,711    | 51,58333 | 34,70667 | 24,42    | 4,896667 | 1,466667 | 0,542133    | 0,224267      | -2,4104    | 0           | -0,5187       | 1,340767    | 0,0553       |
| C9     | <i>M. pulcherrima</i>    | 7,482    | 63,97    | 38,11    | 24,36    | 5,216667 | 16,10333 | 3,0421      | 0,14          | -2,29473   | 0           | 0,461333      | 0,374367    | 0,117733     |
| D3     | <i>H. uvarum</i>         | 3,274667 | 8,82     | 12,40667 | 8,91     | 6,656667 | 0,633333 | 0,287067    | 0,1119        | -1,74267   | 0,209967    | 0,653067      | 0,198133    | 0,223767     |
| E1     | <i>H. uvarum</i>         | 3,229667 | 23,71333 | 23,40833 | 9,435    | 5,366667 | 1,3      | 0,323567    | 0,000717      | -2,24967   | 0           | 1,908833      | 0,02815     | 0,202067     |
| E4     | <i>H. uvarum</i>         | 2,996    | 17,30333 | 23,75667 | 11,21167 | 5,046667 | 0,38     | 0,28485     | -0,09162      | -2,57542   | 0,2383      | 0,0041        | 0,1554      | 0,229667     |

| Sample | Specie                   | OD       | Glucose  | Fructose | Ethanol  | Glycerol | Mannitol | Citric acid | Tartaric acid | Malic acid | Acetic acid | Succinic acid | Lactic acid | Pyruvic acid |
|--------|--------------------------|----------|----------|----------|----------|----------|----------|-------------|---------------|------------|-------------|---------------|-------------|--------------|
| E6     | <i>H. uvarum</i>         | 2,996    | 50,5     | 45,14667 | 11,19667 | 7,14     | 2,096667 | 0,249533    | 0,0377        | -2,44103   | 0,317367    | 1,114467      | -0,06623    | 0,1785       |
| E7     | <i>H. uvarum</i>         | 3,486    | 14,76667 | 21,78    | 6,093333 | 3,143333 | 0,186667 | 0,270733    | -0,27363      | -2,1493    | 0           | -0,1589       | -0,08793    | 0,1458       |
| E10    | <i>M. pulcherrima</i>    | 9,084333 | 103,6533 | 78,54    | 31,18667 | 6,37     | 28,99667 | 6,200033    | 0,297867      | -4,57903   | 0           | 1,046033      | 0,0809      | 0,167167     |
| E11    | <i>H. uvarum</i>         | 2,914333 | 0,143333 | 13,94    | 11,20667 | 5,583333 | 1,116667 | 0,043633    | -0,87827      | -4,41963   | 0           | -0,13123      | 0,1809      | 0,1558       |
| F5     | <i>H. uvarum</i>         | 2,829    | 18,33    | 20,17667 | 8,296667 | 5,383333 | 1,436667 | 0,115167    | -0,26637      | -3,09393   | 0           | 1,5972        | -0,0674     | 0,144267     |
| F7     | <i>L. thermotolerans</i> | 5,125333 | 29,68333 | 18,41667 | 10,74    | 3,27     | 0,703333 | 0,456967    | 0,681533      | 1,787067   | 0           | -0,77437      | -0,06273    | 0,133        |
| F6     | <i>H. uvarum</i>         | 2,906667 | 5,29     | 11,87667 | 6,473333 | 3,273333 | 0,29     | 0,4859      | 0,242567      | -0,4121    | 0           | -0,1655       | -0,10513    | 0,156233     |
| F8     | <i>L. thermotolerans</i> | 5,325333 | 25,02667 | 15,55667 | 11,06667 | 3,616667 | 0,553333 | 0,460833    | 0,221633      | -0,77397   | 0           | -0,45793      | -0,0001     | 0,122967     |
| F11    | <i>H. uvarum</i>         | 2,879    | 3,243333 | 14,18667 | 9,4      | 4,69     | 0,63     | 0,592633    | -0,12367      | -2,07423   | 0           | 0,387533      | -0,01913    | 0,2386       |
| G10    | <i>M. pulcherrima</i>    | 9,525333 | 97,45    | 68,83    | 32,39333 | 4,856667 | 30,91667 | 4,593833    | 0,900467      | -2,8693    | 0           | 1,4952        | 0,1901      | 0,1267       |
| G11    | <i>H. uvarum</i>         | 2,689333 | 12,01667 | 21,24333 | 10,25667 | 5,3      | 0,65     | 0,1073      | -0,33963      | -2,9938    | 0           | 0,0982        | 0,098233    | 0,223533     |
| H2     | <i>H. uvarum</i>         | 2,731333 | 24,63    | 22,31667 | 11,37    | 8,123333 | 2,63     | 0,578067    | 0,373         | -2,21063   | 0,342767    | 1,735333      | 0,016867    | 0,182133     |
| H3     | <i>H. uvarum</i>         | 3,182667 | 22,99667 | 23,70333 | 5,643333 | 3,703333 | 0,74     | 0,301833    | 0,301067      | -0,55923   | 0           | 1,887767      | 0,011933    | 0,180867     |
| H6     | <i>H. uvarum</i>         | 2,856667 | 30,04333 | 32,19667 | 6,4      | 5,413333 | 0,833333 | 0,306633    | 0,118133      | -1,85827   | 0           | 0,323833      | -0,02323    | 0,1219       |
| H11    | <i>H. uvarum</i>         | 2,554667 | 22,32    | 31,38333 | 7,59     | 4,796667 | 0,916667 | 1,002533    | 0,6594        | 0,0696     | 0           | 0,918967      | -0,02823    | 0,323867     |
